# Supplementary material for: Two Fast GC-MS Methods for the Measurement of Nicotine, Propylene Glycol, Vegetable Glycol, Ethylmaltol, Diacetyl, and Acetylpropionyl in Refill Liquids for E-Cigarettes
Source: MDPI journal article supplement (doi:10.3390/molecules28041902), 2023-02-16
Supplement: s1 [file s1]

## Supplementary Material

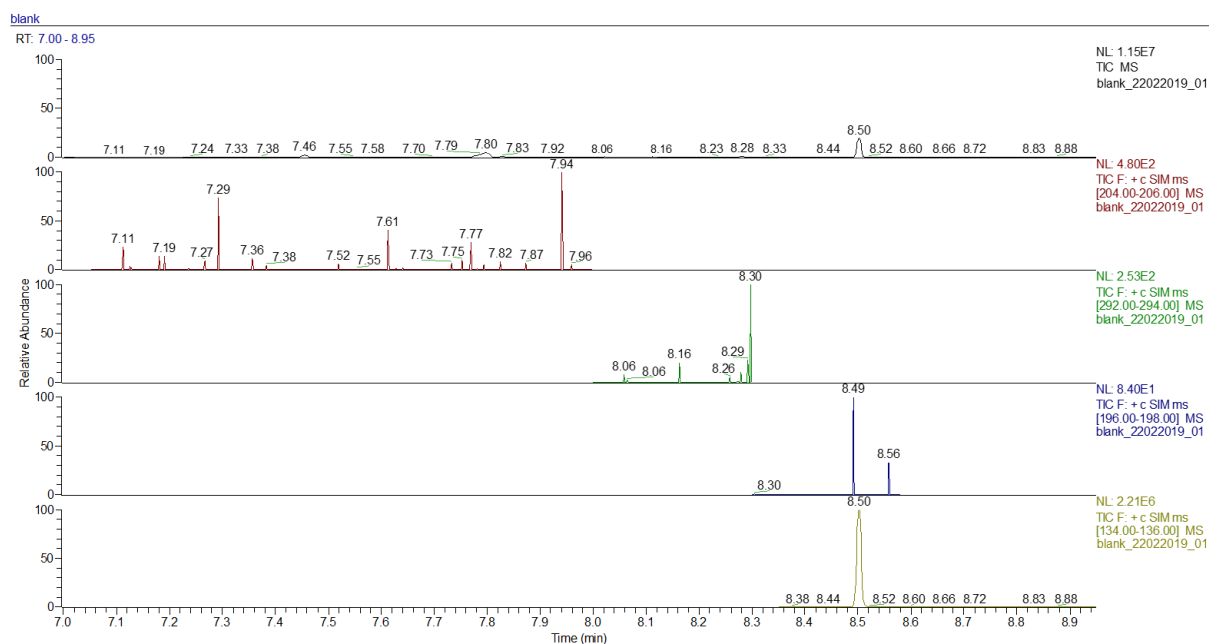

Figure S1. Blank chromatogram after addition of derivatization agent and ISTD acquired using the GC-MS methodology developed for the measurement of PG, VG and EM.

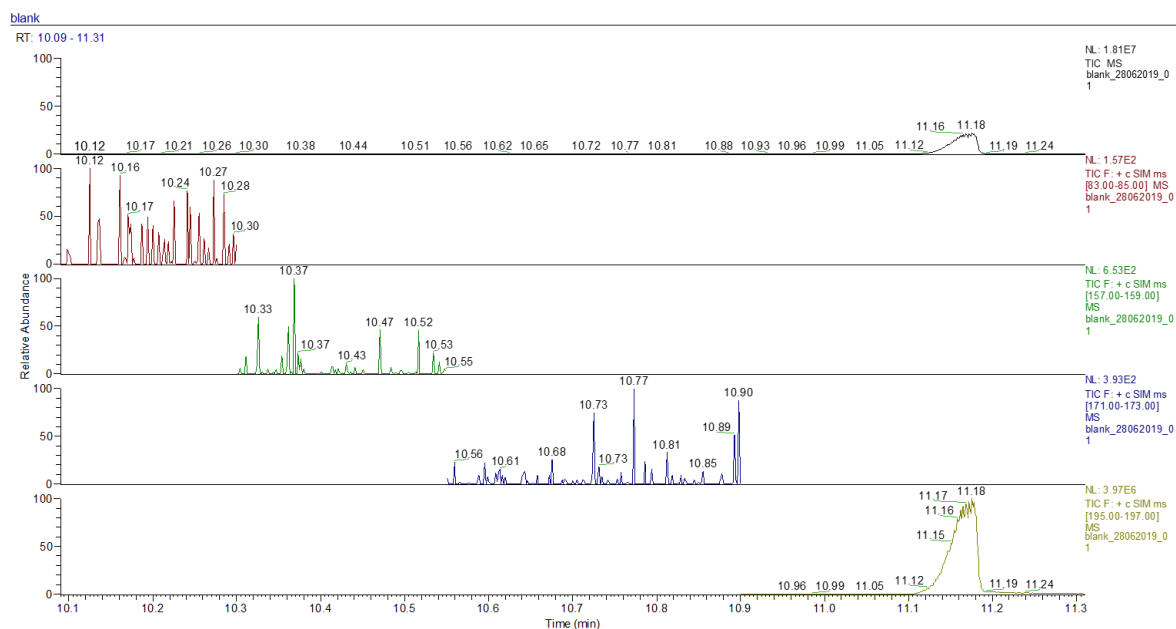

Figure S2. Blank chromatogram after addition of derivatization agent and ISTD acquired using the GC-MS methodology developed for the measurement of nicotine, DA and AP.
